# Supplementary material for: Heterodinuclear [Co-Ln] complexes of semicarbazide-arm bearing ligand: synthesis from the cleavage of starting [Co-Co] complex, structures and magnetic properties
Source: Royal Society of Chemistry journal article supplement (doi:10.1039/d1nj00971k), 2021-01-01
Supplement: d1nj00971k1.pdf [file d1nj00971k1.pdf]

## Electronic Supporting Information

### **Heterodinuclear [Co-Ln] Complexes of Semicarbazide-Arm Bearing Ligand: Synthesis from Cleavage of Starting [Co-Co] Complex, Structures and Magnetic Properties**

Mousumi Biswas,<sup>a</sup> Dipmalya Basak,<sup>a</sup> E. Carolina Sañudo,<sup>b,c</sup> and Debashis Ray<sup>\*a</sup>

<sup>a</sup>Department of Chemistry, Indian Institute of Technology, Kharagpur 721 302, India

<sup>b</sup>Departament de Química Inorgànica i Orgànica, Universitat de Barcelona, Diagonal 645, 08028 Barcelona, Spain

<sup>c</sup>Institut de Nanociència i Nanotecnologia, Universitat de Barcelona, (IN2UB) 08028, Barcelona, Spain

Email: dray@chem.iitkgp.ac.in

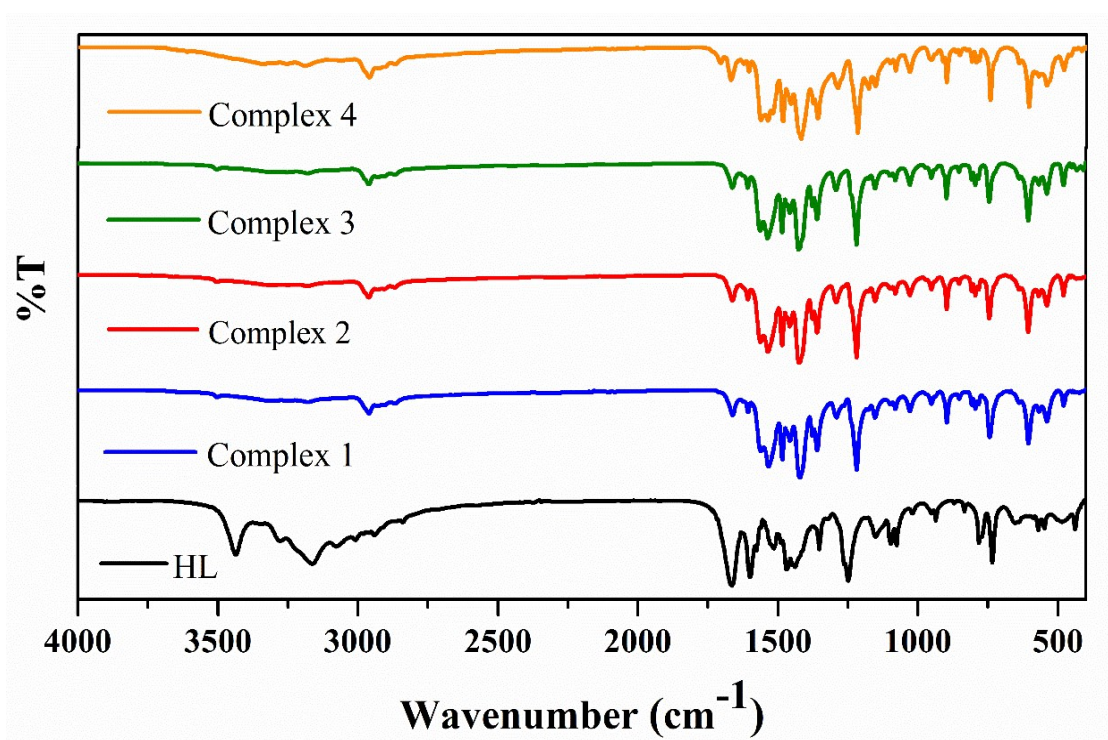

Figure S1. FT-IR spectra of ligand and complexes 1-4.

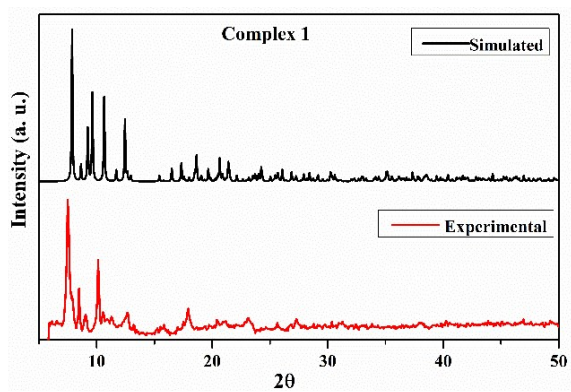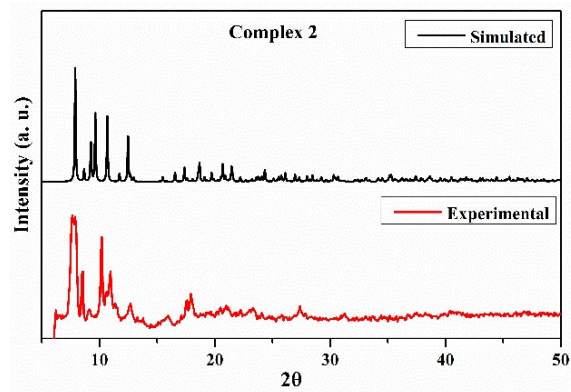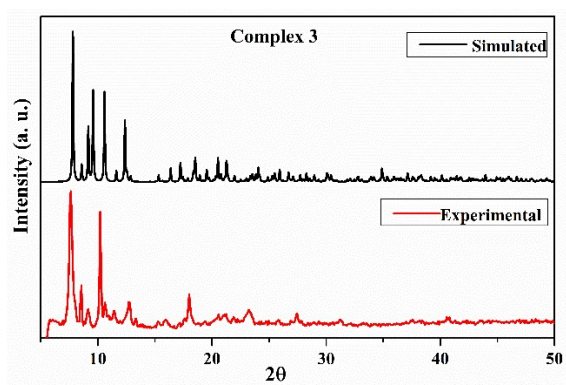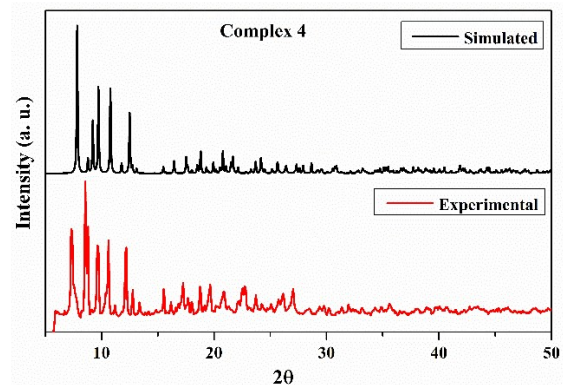

Figure S2. PXRD patterns of complexes 1-4

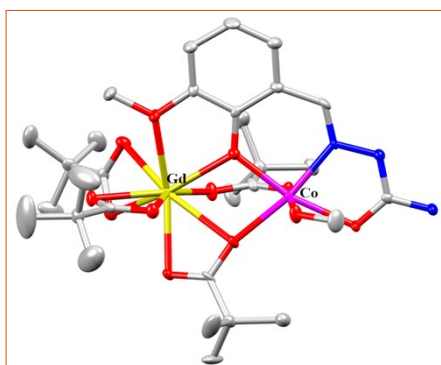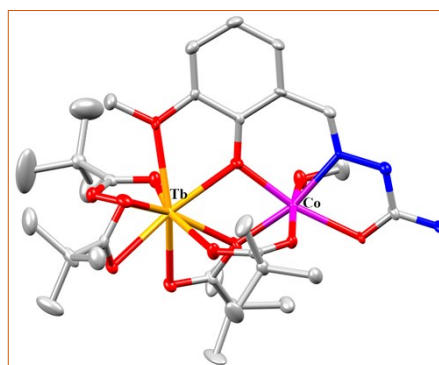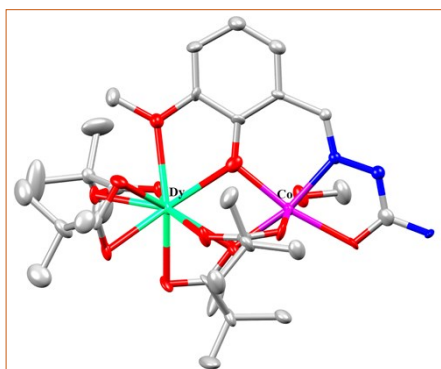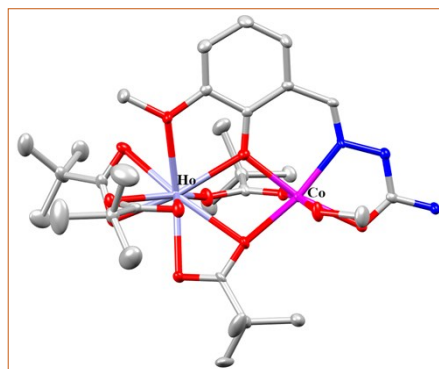

Figure S3. Molecular structure of complexes 1-4.

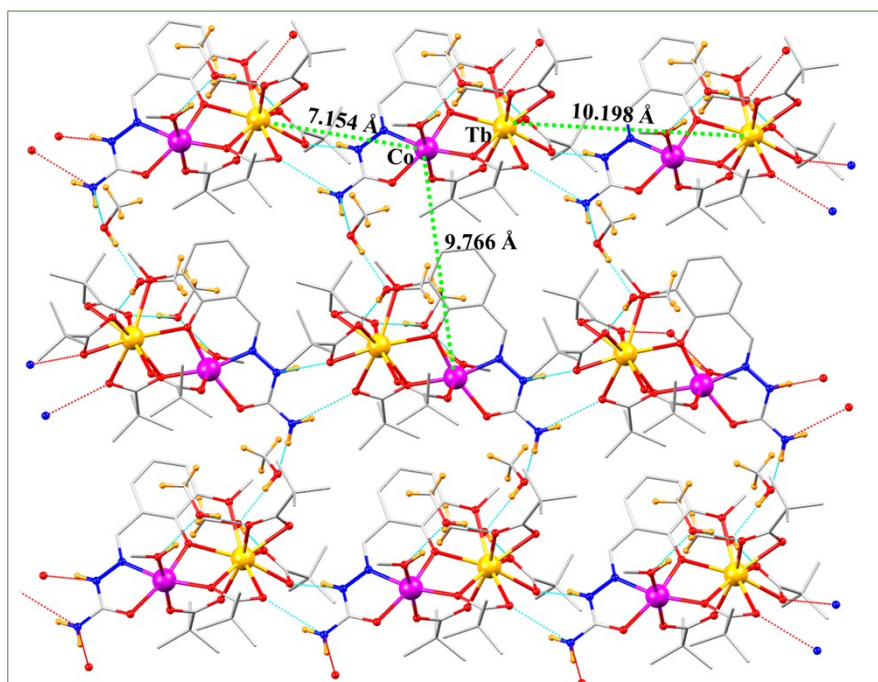

**Figure S4.** Shortest metal-metal distances in complex **2**.

**Table S1.** Comparison study with previously known complexes

| Serial No. | Formula                                                                                                                                                                                                                             | Molar ratio                                                                                                                                                                                                                                                                                                                                                          | Condition                          | Reference                                        |
|------------|-------------------------------------------------------------------------------------------------------------------------------------------------------------------------------------------------------------------------------------|----------------------------------------------------------------------------------------------------------------------------------------------------------------------------------------------------------------------------------------------------------------------------------------------------------------------------------------------------------------------|------------------------------------|--------------------------------------------------|
| 1.         | $[\text{Ln}_2(\text{Hhms})_2(\text{NO}_3)_4] \cdot \text{MeCN}$<br>[Ln = Dy and Er]<br><br>$[\text{Dy}_2(\text{Hhms})_2(\text{NO}_3)_2(\text{H}_2\text{O})_3] \cdot (\text{NO}_3)_2 \cdot \text{MeCN} \cdot (\text{H}_2\text{O})_2$ | $\text{H}_2\text{hms} :$<br>$\text{Dy}(\text{NO}_3)_3 \cdot 6\text{H}_2\text{O} : \text{NaN}_3$<br>(1 : 4 : 2)<br>$\text{H}_2\text{hms} :$<br>$\text{Dy}(\text{NO}_3)_3 \cdot 6\text{H}_2\text{O} : \text{NET}_3$<br>(1 : 4 : 2)                                                                                                                                     | Stirred for 3 h<br>stirred for 3 h | Eur. J. Inorg. Chem., Chen <i>et. al.</i> , 2017 |
| 2.         | $[\text{M}_2\text{Ln}_2(\text{Hhms})_2(\text{CH}_3\text{COO})_6 - (\text{CH}_3\text{OH})_2(\text{H}_2\text{O})_2] \cdot (\text{NO}_3)_2$<br>[M = Ni <sup>II</sup> , Co <sup>II</sup> ; Ln = Dy, Gd and Y]                           | $\text{H}_2\text{hms} :$<br>$\text{M}(\text{CH}_3\text{COO})_2 \cdot 4\text{H}_2\text{O} :$<br>$\text{Ln}(\text{NO}_3)_3 \cdot 6\text{H}_2\text{O}$<br>(1 : 4 : 1)                                                                                                                                                                                                   | Stirred for 1h                     | Inorg. Chem., Chen <i>et. al.</i> , 2017         |
| 3.         | $[\text{DyZn}_2(\text{Hhms})_2(\text{C}_6\text{H}_5\text{COO})_4] \cdot \text{C}_6\text{H}_5\text{COO}$<br><br>$[\text{DyZn}_2(\text{Hhms})_2(\text{CH}_3\text{COO})_4] \cdot \text{CH}_3\text{COO}$                                | $\text{H}_2\text{hms} :$<br>$\text{Zn}(\text{C}_6\text{H}_5\text{COO})_2 :$<br>$\text{Dy}(\text{C}_6\text{H}_5\text{COO})_3 : \text{NaN}_3$<br>(2 : 2 : 1 : 1)<br>$\text{H}_2\text{hms} :$<br>$\text{Zn}(\text{CH}_3\text{COO})_2 \cdot 2\text{H}_2\text{O} :$<br>$\text{Dy}(\text{CH}_3\text{COO})_3 \cdot 4\text{H}_2\text{O} :$<br>$\text{NaN}_3$ (2 : 2 : 1 : 1) | Stirred for 0.5 h                  | Dalton Trans., Chen <i>et. al.</i> , 2018        |
| 4.         | $[\text{LnCoL}(\text{O}_2\text{CMe}_3)_4(\text{CH}_3\text{OH})] \cdot 3\text{CH}_3\text{OH}$<br>[Co <sup>II</sup> , Ln = Gd, Tb, Dy, Ho]                                                                                            | HL : Co <sub>2</sub> -Piv :<br>$\text{Ln}(\text{NO}_3)_3 \cdot n\text{H}_2\text{O} : \text{NET}_3$<br>(1 : 0.5 : 1 : 2)                                                                                                                                                                                                                                              | Stirred for 8h                     | This work                                        |

Hhms/HL = (2-Hydroxy-3-methoxybenzylidene)-semicarbazide

**Table S2.** Continuous Shape Measures Calculations for Co<sup>II</sup> ions of complexes **1-4**\*

| Complex  | HP-6   | PPY-6  | <b>OC-6</b>  | TPR-6  | JPPY-5 |
|----------|--------|--------|--------------|--------|--------|
| <b>1</b> | 28.796 | 22.056 | <b>1.838</b> | 10.171 | 25.653 |
| <b>2</b> | 28.761 | 21.913 | <b>1.882</b> | 10.056 | 25.508 |
| <b>3</b> | 28.486 | 22.179 | <b>1.821</b> | 10.231 | 25.672 |
| <b>4</b> | 28.445 | 21.842 | <b>1.882</b> | 10.003 | 25.467 |

\* HP-6 = Hexagon D<sub>6h</sub>; PPY-6 = Pentagonal pyramid C<sub>5v</sub>; OC-6 = Octahedron O<sub>h</sub>; TPR-6 = Trigonal prism D<sub>3h</sub>; JPPY-5 = Johnson pentagonal pyramid (J2) C<sub>5v</sub>

|          | EP-9   | OPY-9  | HBPY-9 | JTC-9  | JCCU-9 | CCU-9 | JCSAPR-9 | CSAPR-9 | JTCTPR-9 | TCTPR-9 | JTDIC-9 | HH-9  | MFF-9        |
|----------|--------|--------|--------|--------|--------|-------|----------|---------|----------|---------|---------|-------|--------------|
| <b>1</b> | 32.208 | 24.536 | 15.786 | 14.642 | 7.344  | 6.114 | 5.608    | 4.853   | 5.160    | 4.597   | 10.867  | 5.228 | <b>3.752</b> |
| <b>2</b> | 32.174 | 24.566 | 15.855 | 14.638 | 7.391  | 6.140 | 5.474    | 4.735   | 5.077    | 4.524   | 10.984  | 5.291 | <b>3.665</b> |
| <b>3</b> | 31.961 | 24.612 | 16.091 | 14.414 | 7.563  | 6.343 | 5.262    | 4.5558  | 4.907    | 4.414   | 11.051  | 5.328 | <b>3.519</b> |
| <b>4</b> | 32.252 | 24.154 | 15.985 | 14.607 | 7.498  | 6.267 | 5.275    | 4.529   | 4.931    | 4.304   | 11.163  | 5.489 | <b>3.514</b> |

**Table S3.** Continuous Shape Measures Calculations for Ln<sup>III</sup> ions of complexes **1-4**#

# EP-9 = Enneagon (D<sub>9h</sub>); OPY-9 = Octagonal pyramid C<sub>8v</sub>; HBPY-9 = Heptagonal bipyramid D<sub>7h</sub>; JTC-9 = Triangular cupola (J3) = trivacant cuboctahedron C<sub>3v</sub>; JCCU-9 = Capped cube (Elongated square pyramid, J8) C<sub>4v</sub>; CCU-9 = Capped cube C<sub>4v</sub>; JCSAPR-9 = Capped sq. antiprism (Gyroelongated square pyramid J10) C<sub>4v</sub>; CSAPR-9 = Capped square antiprism C<sub>4v</sub>; JTCTPR-9 = Tricapped trigonal prism (J51) D<sub>3h</sub>; TCTPR-9 = Tricapped trigonal prism D<sub>3h</sub>; JTDIC-9 = Tridiminished icosahedron (J63) C<sub>3v</sub>; HH-9 = Hula-hoop C<sub>2v</sub>; MFF-9 = Muffin C<sub>s</sub>

**Table S4.** Important bond lengths (Å) of complexes **1-4**

| <b>Complex 1</b> |          |        |          |        |          |
|------------------|----------|--------|----------|--------|----------|
| Gd1–O1           | 2.347(6) | Gd1–O8 | 2.441(6) | Co1–O2 | 2.113(5) |
| Gd1–O3           | 2.556(6) | Gd1–O9 | 2.440(5) | Co1–O5 | 2.035(5) |

|                  |           |         |           |         |           |
|------------------|-----------|---------|-----------|---------|-----------|
| Gd1–O4           | 2.293(5)  | Gd1–O10 | 2.432(5)  | Co1–O6  | 2.101(6)  |
| Gd1–O6           | 2.453(5)  | Gd1–O11 | 2.456(6)  | Co1–O12 | 2.082(5)  |
| Gd1–O7           | 2.470(5)  | Co1–O1  | 2.036(5)  | Co1–N1  | 2.038(6)  |
| <b>Complex 2</b> |           |         |           |         |           |
| Tb1–O1           | 2.330(5)  | Tb1–O8  | 2.422(5)  | Co1–O2  | 2.105(5)  |
| Tb1–O3           | 2.545(5)  | Tb1–O9  | 2.414(5)  | Co1–O5  | 2.031(5)  |
| Tb1–O4           | 2.271(5)  | Tb1–O10 | 2.410(5)  | Co1–O6  | 2.092(5)  |
| Tb1–O6           | 2.431(5)  | Tb1–O11 | 2.438(5)  | Co1–O12 | 2.074(5)  |
| Tb1–O7           | 2.465(5)  | Co1–O1  | 2.036(5)  | Co1–N1  | 2.039(5)  |
| <b>Complex 3</b> |           |         |           |         |           |
| Dy–O1            | 2.323(12) | Dy–O8   | 2.440(12) | Co–O2   | 2.126(11) |
| Dy–O3            | 2.555(12) | Dy–O9   | 2.432(10) | Co–O5   | 2.031(12) |
| Dy–O4            | 2.295(11) | Dy–O10  | 2.432(10) | Co–O6   | 2.106(11) |
| Dy–O6            | 2.454(11) | Dy–O11  | 2.446(11) | Co–O12  | 2.095(11) |
| Dy–O7            | 2.466(11) | Co–O1   | 2.063(11) | Co–N1   | 2.074(11) |
| <b>Complex 4</b> |           |         |           |         |           |
| Ho1–O1           | 2.276(4)  | Ho1–O8  | 2.410(4)  | Co–O2   | 2.087(4)  |
| Ho1–O3           | 2.509(4)  | Ho1–O9  | 2.369(4)  | Co–O5   | 2.036(4)  |
| Ho1–O4           | 2.242(4)  | Ho1–O10 | 2.373(4)  | Co–O6   | 2.067(4)  |
| Ho1–O6           | 2.408(4)  | Ho1–O11 | 2.425(4)  | Co–O12  | 2.085(4)  |
| Ho1–O7           | 2.429(4)  | Co–O1   | 2.024(4)  | Co–N1   | 2.020(4)  |

**Table S5.** Selected bond angles (°) of complexes 1-4

|                  |           |           |            |            |           |
|------------------|-----------|-----------|------------|------------|-----------|
| <b>Complex 1</b> |           |           |            |            |           |
| O1–Gd1–O3        | 62.69(16) | O4–Gd1–O8 | 153.62(17) | O9–Gd1–O11 | 82.88(18) |

|            |            |            |            |             |            |
|------------|------------|------------|------------|-------------|------------|
| O1-Gd1-O4  | 79.43(18)  | O4-Gd1-O9  | 150.31(17) | O10-Gd1-O11 | 52.81(16)  |
| O1-Gd1-O6  | 66.80(17)  | O4-Gd1-O10 | 77.60(19)  | O1-Co1-O2   | 166.39(19) |
| O1-Gd1-O7  | 119.04(16) | O4-Gd1-O11 | 76.24(19)  | O1-Co1-O6   | 79.4(2)    |
| O1-Gd1-O8  | 87.02(17)  | O6-Gd1-O7  | 52.33(18)  | O5-Co1-O1   | 92.4(2)    |
| O1-Gd1-O9  | 127.79(18) | O6-Gd1-O8  | 77.6(2)    | O5-Co1-O2   | 85.4(2)    |
| O1-Gd1-O10 | 153.34(16) | O6-Gd1-O9  | 122.22(19) | O5-Co1-O6   | 93.7(2)    |
| O1-Gd1-O11 | 108.36(16) | O6-Gd1-O10 | 119.70(18) | O12-Co1-O2  | 87.0(2)    |
| O3-Gd1-O4  | 115.5(2)   | O6-Gd1-O11 | 152.54(18) | O12-Co1-O6  | 83.5(2)    |
| O3-Gd1-O6  | 123.78(17) | O7-Gd1-O8  | 78.0(2)    | O1-Co1-O12  | 96.5(2)    |
| O3-Gd1-O7  | 154.64(17) | O7-Gd1-O9  | 86.79(19)  | O6-Co1-O2   | 114.1(2)   |
| O3-Gd1-O8  | 76.81(19)  | O7-Gd1-O10 | 73.92(17)  | O5-Co1-O12  | 170.1(2)   |
| O3-Gd1-O9  | 75.48(18)  | O7-Gd1-O11 | 126.47(17) | O1-Co1-N1   | 89.1(2)    |
| O3-Gd1-O10 | 116.50(16) | O8-Gd1-O9  | 52.62(16)  | O5-Co1-N1   | 92.4(2)    |
| O3-Gd1-O11 | 69.83(17)  | O8-Gd1-O10 | 119.35(17) | N1-Co1-O2   | 77.7(2)    |
| O4-Gd1-O6  | 76.3(2)    | O8-Gd1-O11 | 129.86(19) | N1-Co1-O6   | 166.7(2)   |
| O4-Gd1-O7  | 88.9(2)    | O9-Gd1-O10 | 72.98(19)  | N1-Co1-O12  | 91.2(2)    |

| <b>Complex 2</b> |            |            |            |             |            |
|------------------|------------|------------|------------|-------------|------------|
| O1-Tb1-O3        | 62.92(15)  | O4-Tb1-O8  | 153.54(16) | O9-Tb1-O11  | 82.83(16)  |
| O1-Tb1-O4        | 79.55(16)  | O4-Tb1-O9  | 149.93(16) | O10-Tb1-O11 | 52.93(15)  |
| O1-Tb1-O6        | 67.00(15)  | O4-Tb1-O10 | 77.36(16)  | O1-Co1-O2   | 166.27(18) |
| O1-Tb1-O7        | 119.32(16) | O4-Tb1-O11 | 75.96(17)  | O1-Co1-O6   | 79.13(18)  |
| O1-Tb1-O8        | 86.58(16)  | O6-Tb1-O7  | 52.43(15)  | O5-Co1-O1   | 92.30(18)  |
| O1-Tb1-O9        | 128.00(16) | O6-Tb1-O8  | 77.41(16)  | O5-Co1-O2   | 85.34(18)  |
| O1-Tb1-O10       | 153.34(15) | O6-Tb1-O9  | 122.26(16) | O5-Co1-O6   | 93.38(19)  |

|            |            |            |            |            |            |
|------------|------------|------------|------------|------------|------------|
| O1-Tb1-O11 | 108.33(16) | O6-Gd1-O10 | 119.34(16) | O12-Co1-O2 | 86.77(18)  |
| O3-Tb1-O4  | 115.61(18) | O6-Tb1-O11 | 152.40(17) | O12-Co1-O6 | 83.95(19)  |
| O3-Tb1-O6  | 124.14(15) | O7-Tb1-O8  | 78.12(17)  | O1-Co1-O12 | 96.89(19)  |
| O3-Tb1-O7  | 154.36(15) | O7-Tb1-O9  | 86.45(16)  | O6-Co1-O2  | 114.49(18) |
| O3-Tb1-O8  | 76.53(17)  | O7-Tb1-O10 | 73.60(15)  | O5-Co1-O12 | 169.76(19) |
| O3-Tb1-O9  | 75.35(16)  | O7-Tb1-O11 | 126.29(16) | O1-Co1-N1  | 89.15(19)  |
| O3-Tb1-O10 | 116.51(15) | O8-Tb1-O9  | 53.20(15)  | O5-Co1-N1  | 93.5(2)    |
| O3-Tb1-O11 | 69.83(16)  | O8-Tb1-O10 | 119.82(15) | N1-Co1-O2  | 77.52(19)  |
| O4-Tb1-O6  | 76.45(17)  | O8-Tb1-O11 | 130.16(17) | N1-Co1-O6  | 166.6(2)   |
| O4-Tb1-O7  | 89.13(17)  | O9-Tb1-O10 | 72.86(16)  | N1-Co1-O12 | 91.1(2)    |

| <b>Complex 3</b> |          |            |          |             |          |
|------------------|----------|------------|----------|-------------|----------|
| O1-Dy1-O3        | 63.1(4)  | O4-Dy1-O8  | 153.9(4) | O9-Dy1-O11  | 81.8(4)  |
| O1-Dy1-O4        | 79.9(4)  | O4-Dy1-O9  | 149.3(4) | O10-Dy1-O11 | 53.3(4)  |
| O1-Dy1-O6        | 67.0(4)  | O4-Dy1-O10 | 77.0(4)  | O1-Co1-O2   | 166.9(4) |
| O1-Tb1-O7        | 119.5(4) | O4-Dy1-O11 | 76.5(4)  | O1-Co1-O6   | 78.6(5)  |
| O1-Dy1-O8        | 86.2(4)  | O6-Dy1-O7  | 52.6(4)  | O5-Co1-O1   | 91.7(4)  |
| O1-Dy1-O9        | 128.2(4) | O6-Dy1-O8  | 77.4(4)  | O5-Co1-O2   | 85.8(4)  |
| O1-Dy1-O10       | 153.4(4) | O6-Dy1-O9  | 122.5(4) | O5-Co1-O6   | 93.8(5)  |
| O1-Dy1-O11       | 108.4(4) | O6-Dy1-O10 | 119.3(4) | O12-Co1-O2  | 87.0(4)  |
| O3-Dy1-O4        | 116.2(4) | O6-Dy1-O11 | 153.3(4) | O12-Co1-O6  | 83.9(5)  |
| O3-Dy1-O6        | 124.1(4) | O7-Dy1-O8  | 78.0(4)  | O1-Co1-O12  | 96.6(5)  |
| O3-Dy1-O7        | 153.3(4) | O7-Dy1-O9  | 86.0(4)  | O6-Co1-O2   | 114.4(4) |
| O3-Dy1-O8        | 75.7(4)  | O7-Dy1-O10 | 73.7(4)  | O5-Co1-O12  | 170.7(5) |
| O3-Dy1-O9        | 74.9(4)  | O7-Dy1-O11 | 126.8(4) | O1-Co1-N1   | 90.1(5)  |

|            |          |            |          |            |          |
|------------|----------|------------|----------|------------|----------|
| O3–Dy1–O10 | 116.6(4) | O8–Dy1–O9  | 53.7(4)  | O5–Co1–N1  | 93.4(5)  |
| O3–Dy1–O11 | 69.5(4)  | O8–Dy1–O10 | 120.1(3) | N1–Co1–O2  | 77.2(4)  |
| O4–Dy1–O6  | 76.8(4)  | O8–Dy1–O11 | 129.2(4) | N1–Co1–O6  | 166.8(5) |
| O4–Dy1–O7  | 89.7(4)  | O9–Dy1–O10 | 72.6(4)  | N1–Co1–O12 | 90.7(5)  |

| <b>Complex 4</b> |            |            |            |             |            |
|------------------|------------|------------|------------|-------------|------------|
| O1–Ho1–O3        | 63.35(13)  | O4–Ho1–O8  | 153.56(14) | O9–Ho1–O11  | 83.76(13)  |
| O1–Ho1–O4        | 80.38(14)  | O4–Ho1–O9  | 149.37(14) | O10–Ho1–O11 | 53.10(13)  |
| O1–Ho1–O6        | 67.47(13)  | O4–Ho1–O10 | 76.13(14)  | O1–Co1–O2   | 166.52(15) |
| O1–Ho1–O7        | 119.51(13) | O4–Ho1–O11 | 75.11(14)  | O1–Co1–O6   | 79.03(15)  |
| O1–Ho1–O8        | 86.02(13)  | O6–Ho1–O7  | 52.18(12)  | O5–Co1–O1   | 91.56(15)  |
| O1–Ho1–O9        | 127.82(14) | O6–Ho1–O8  | 76.25(14)  | O5–Co1–O2   | 85.57(16)  |
| O1–Ho1–O10       | 152.78(13) | O6–Ho1–O9  | 121.17(14) | O5–Co1–O6   | 94.00(16)  |
| O1–Ho1–O11       | 107.55(13) | O6–Ho1–O10 | 119.51(14) | O12–Co1–O2  | 86.52(16)  |
| O3–Ho1–O4        | 116.19(15) | O6–Ho1–O11 | 152.72(14) | O12–Co1–O6  | 83.34(16)  |
| O3–Ho1–O6        | 124.61(13) | O7–Ho1–O8  | 77.14(15)  | O1–Co1–O12  | 97.61(16)  |
| O3–Ho1–O7        | 153.18(13) | O7–Ho1–O9  | 85.40(14)  | O6–Co1–O2   | 114.28(15) |
| O3–Ho1–O8        | 76.50(15)  | O7–Ho1–O10 | 74.35(13)  | O5–Co1–O12  | 169.76(16) |
| O3–Ho1–O9        | 74.99(13)  | O7–Ho1–O11 | 127.28(13) | O1–Co1–N1   | 88.83(16)  |
| O3–Ho1–O10       | 115.89(13) | O8–Ho1–O9  | 53.51(13)  | O5–Co1–N1   | 93.08(19)  |
| O3–Ho–O11        | 69.26(13)  | O8–Ho1–O10 | 120.91(13) | N1–Co1–O2   | 78.20(16)  |
| O4–Ho1–O6        | 77.62(15)  | O8–Ho1–O11 | 130.95(14) | N1–Co1–O6   | 166.09(18) |
| O4–Ho1–O7        | 89.96(15)  | O9–Ho1–O10 | 73.46(13)  | N1–Co1–O12  | 91.66(19)  |

**Table S6.** H-bonding parameters for complexes 1-4



| Complex 1     |                |         |           |           |             |
|---------------|----------------|---------|-----------|-----------|-------------|
| Interactions  | Type of H-bond | D–H (Å) | H···A (Å) | D···A (Å) | D–H···A (°) |
| N2–H2···O10   | Inter          | 0.860   | 2.051     | 2.815     | 147.73      |
| N3–H3B···O7   | Inter          | 0.860   | 2.222     | 2.980     | 146.86      |
| N3–H3A···O15  | Intra          | 0.861   | 2.095     | 2.863     | 148.39      |
| O13–H13···O11 | Intra          | 0.820   | 1.911     | 2.723     | 170.35      |
| O12–H12···O15 | Intra          | 0.929   | 1.697     | 2.603     | 163.93      |
| O15–H15···O8  | Intra          | 0.820   | 1.924     | 2.674     | 151.53      |
| O14–H14···O13 | Intra          | 0.820   | 1.866     | 2.683     | 173.48      |

| Complex 2     |                |         |           |           |             |
|---------------|----------------|---------|-----------|-----------|-------------|
| Interactions  | Type of H-bond | D–H (Å) | H···A (Å) | D···A (Å) | D–H···A (°) |
| N2–H2···O10   | Inter          | 0.860   | 2.041     | 2.811     | 148.61      |
| N3–H3B···O7   | Inter          | 0.860   | 2.209     | 2.967     | 146.84      |
| N3–H3A···O15  | Intra          | 0.861   | 2.095     | 2.686     | 149.12      |
| O13–H13···O11 | Intra          | 0.820   | 1.902     | 2.720     | 175.71      |
| O14–H14···O13 | Intra          | 0.820   | 1.875     | 2.689     | 171.74      |
| O12–H12···O15 | Intra          | 0.930   | 1.695     | 2.600     | 163.35      |
| O15–H15···O8  | Intra          | 0.819   | 1.902     | 2.658     | 152.87      |

| Complex 3    |                |         |           |           |             |
|--------------|----------------|---------|-----------|-----------|-------------|
| Interactions | Type of H-bond | D–H (Å) | H···A (Å) | D···A (Å) | D–H···A (°) |
| N2–H2···O10  | Inter          | 0.860   | 2.071     | 2.843     | 148.96      |

|               |       |       |       |       |        |
|---------------|-------|-------|-------|-------|--------|
| N3–H3B···O7   | Inter | 0.859 | 2.259 | 3.011 | 146.10 |
| N3–H3A···O15  | Intra | 0.861 | 2.125 | 2.891 | 148.00 |
| O13–H13···O11 | Intra | 0.820 | 2.145 | 2.767 | 132.60 |
| O14–H14···O8  | Intra | 0.820 | 2.115 | 2.677 | 125.67 |
| O12–H12···O14 | Intra | 0.930 | 1.715 | 2.620 | 163.43 |
| O15–H15···O13 | Intra | 0.820 | 1.893 | 2.682 | 161.31 |

| Complex 4     |                |         |           |           |             |
|---------------|----------------|---------|-----------|-----------|-------------|
| Interactions  | Type of H-bond | D–H (Å) | H···A (Å) | D···A (Å) | D–H···A (°) |
| N2–H2···O10   | Inter          | 0.860   | 2.036     | 2.797     | 147.14      |
| N3–H3B···O7   | Inter          | 0.859   | 2.182     | 2.928     | 145.05      |
| N3–H3A···O14  | Intra          | 0.861   | 2.092     | 2.869     | 149.71      |
| O13–H13···O11 | Intra          | 0.820   | 1.905     | 2.722     | 175.14      |
| O14–H14···O13 | Intra          | 0.820   | 1.839     | 2.657     | 175.78      |
| O12–H12···O15 | Intra          | 0.930   | 1.675     | 2.575     | 161.98      |
| O15–H15···O8  | Intra          | 0.821   | 1.876     | 2.647     | 156.14      |
